# Supplementary material for: Spin crossover in mixed ligand iron(iii) complexes
Source: Royal Society of Chemistry journal article supplement (doi:10.1039/c7nj03676k), 2017-01-01
Supplement: c7nj03676k1.pdf [file c7nj03676k1.pdf]

**Supplementary Material for:**

**Spin crossover in mixed ligand iron(III) complexes**

Wasinee Phonsri,<sup>a</sup> Phimphaka Harding,<sup>a</sup> Keith S. Murray,<sup>b</sup>  
Boujemaa Moubaraki,<sup>b</sup> and David J. Harding\*<sup>a</sup>

*E-mail: hdavid@g-mail.wu.ac.th*

<sup>a</sup> *Functional Materials and Nanotechnology Center of Excellence (FuNTech), Walailak University, Thasala, Nakhon Si Thammarat, 80160, Thailand.*

<sup>b</sup> *School of Chemistry, Monash University, Clayton, Melbourne, Victoria, 3800, Australia.*

## Supporting Figures

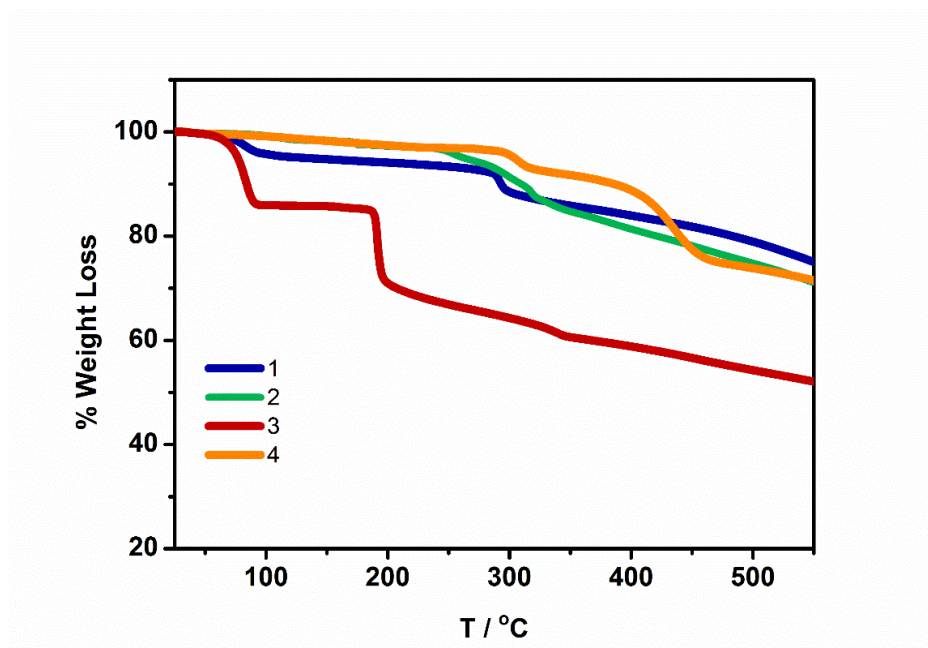

**Figure S1** TGA studies of  $[\text{Fe}(\text{qsal-Cl})(\text{qsal-Br})\text{Y}]$  ( $\text{Y} = \text{NCS}$  **1**,  $\text{PF}_6$  **2**,  $\text{BPh}_4$  **3** and  $\text{OTf}$  **4**).

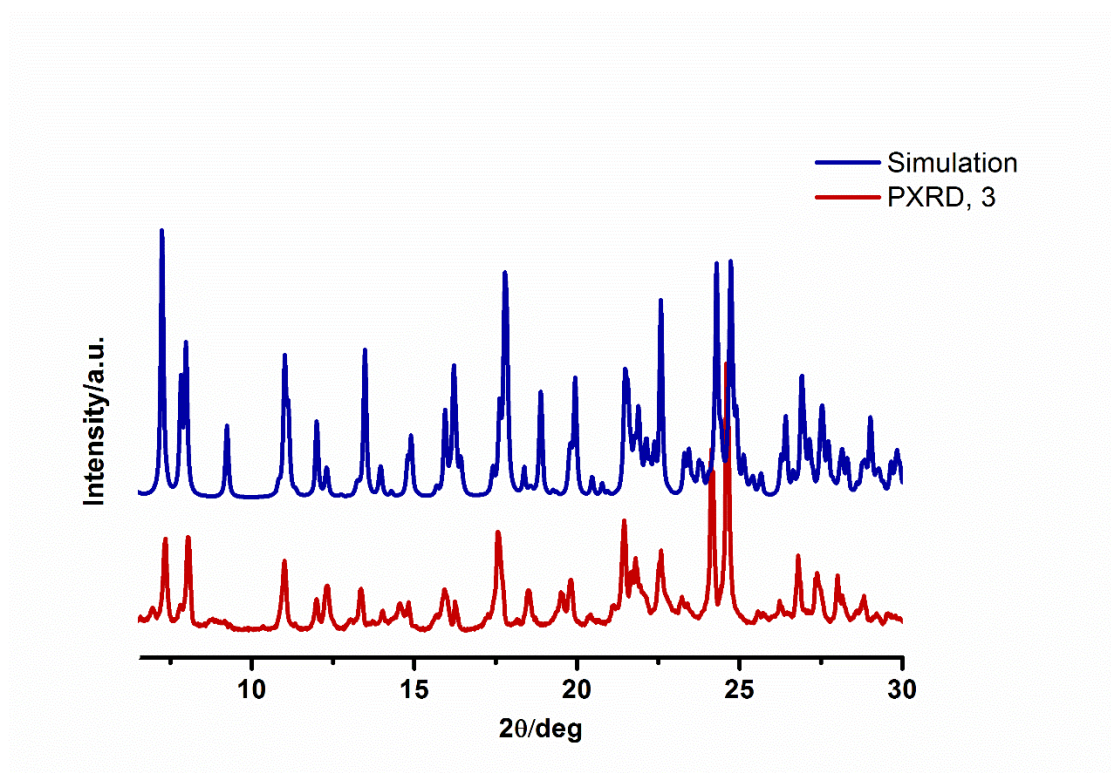

**Figure S2** PXRD of  $[\text{Fe}(\text{qsal-Cl})(\text{qsal-Br})\text{BPh}_4 \cdot 2\text{CH}_2\text{Cl}_2]$  **3**.

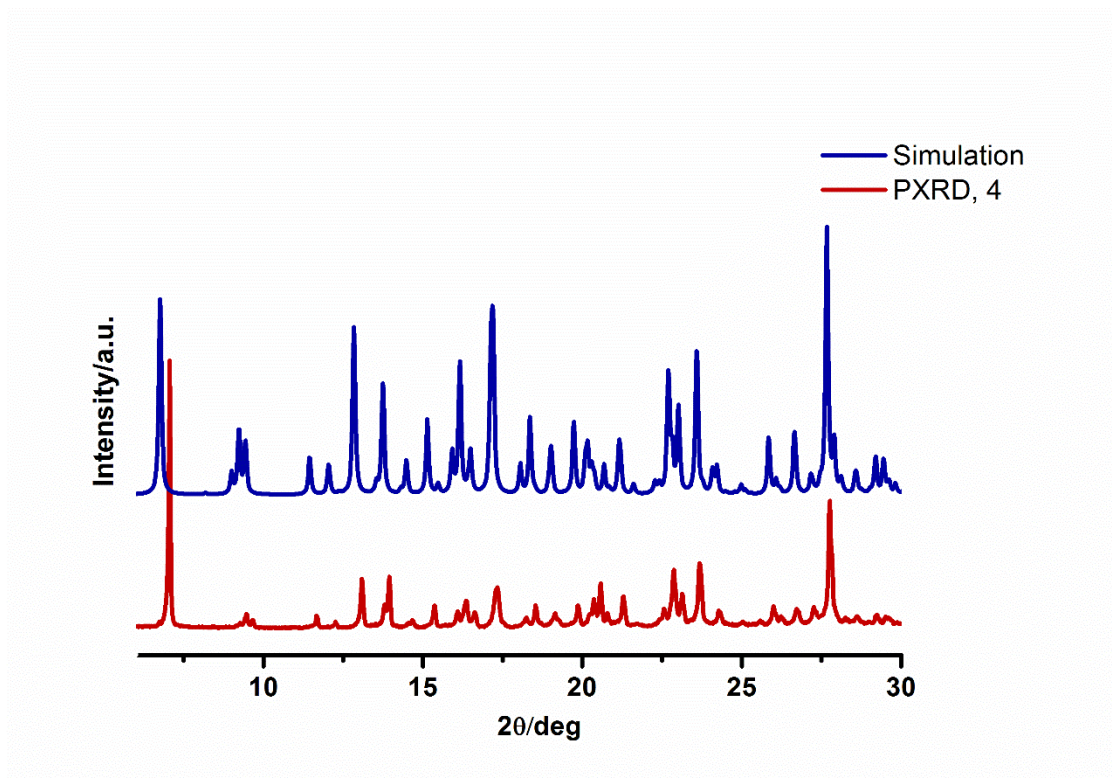

Figure S3 PXR D of  $[\text{Fe}(\text{qsal-Cl})(\text{qsal-Br})]\text{OTf}\cdot 0.5\text{MeOH}$  4.

### X-ray Crystallography

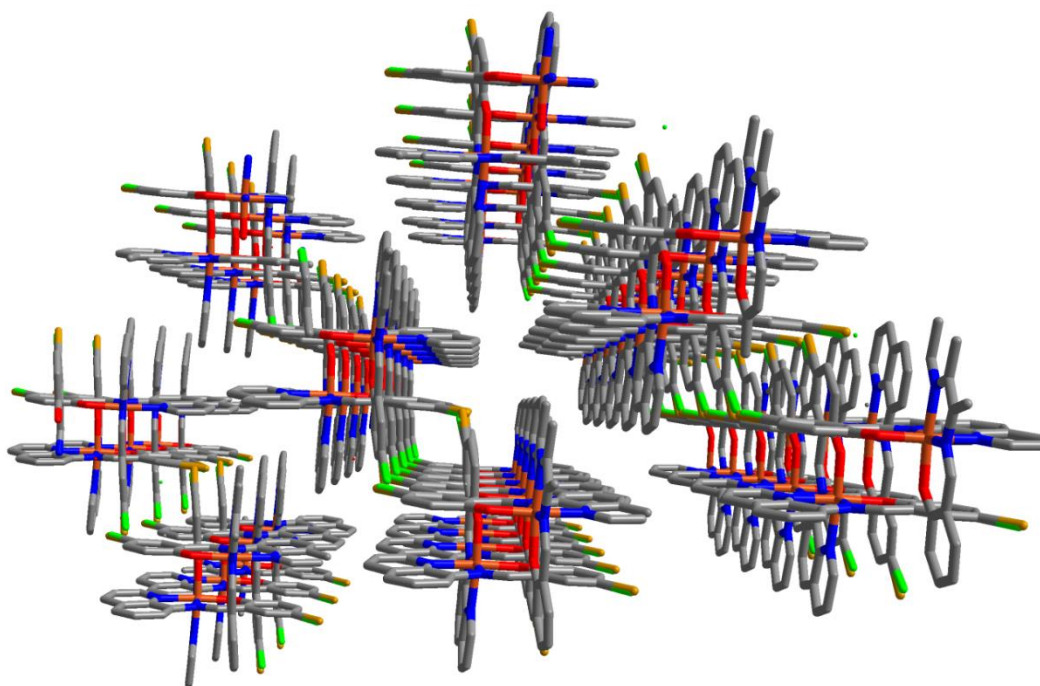

Figure S4 View of the 1D  $\pi$ - $\pi$  chains in  $[\text{Fe}(\text{qsal-Cl})(\text{qsal-Br})]\text{NCS}\cdot\text{MeOH}$  1.

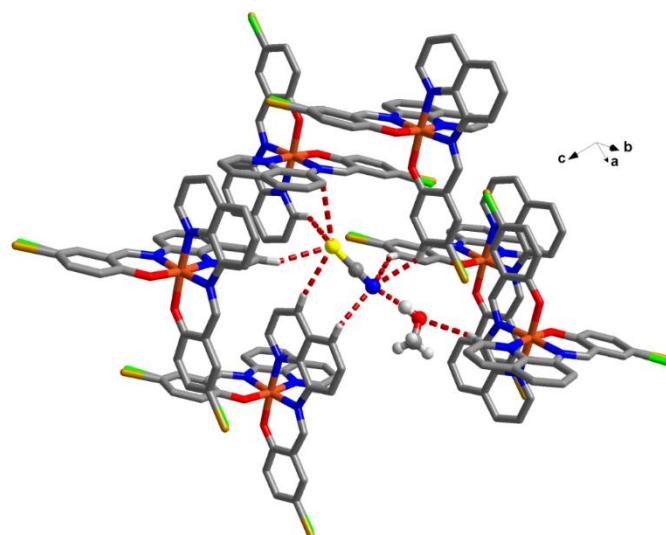

**Figure S5** View of the interactions between the thiocyanate and the  $[\text{Fe}(\text{qsal-Cl})(\text{qsal-Br})]^+$  cations in  $[\text{Fe}(\text{qsal-Cl})(\text{qsal-Br})]\text{NCS}\cdot\text{MeOH}$  **1**.

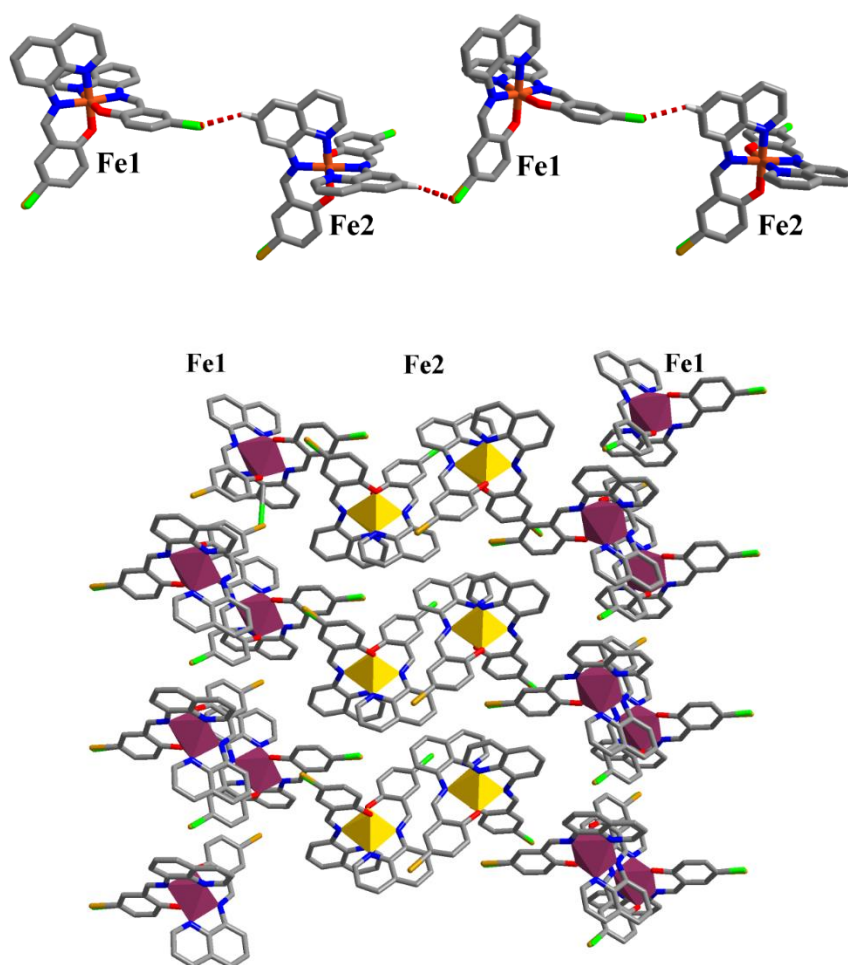

**Figure S6** View of the  $\text{C-H}\cdots\text{Cl/Br}$  interactions that link the  $[\text{Fe}(\text{qsal-Cl})(\text{qsal-Br})]^+$  cations in  $[\text{Fe}(\text{qsal-Cl})(\text{qsal-Br})]\text{PF}_6$  **2**.

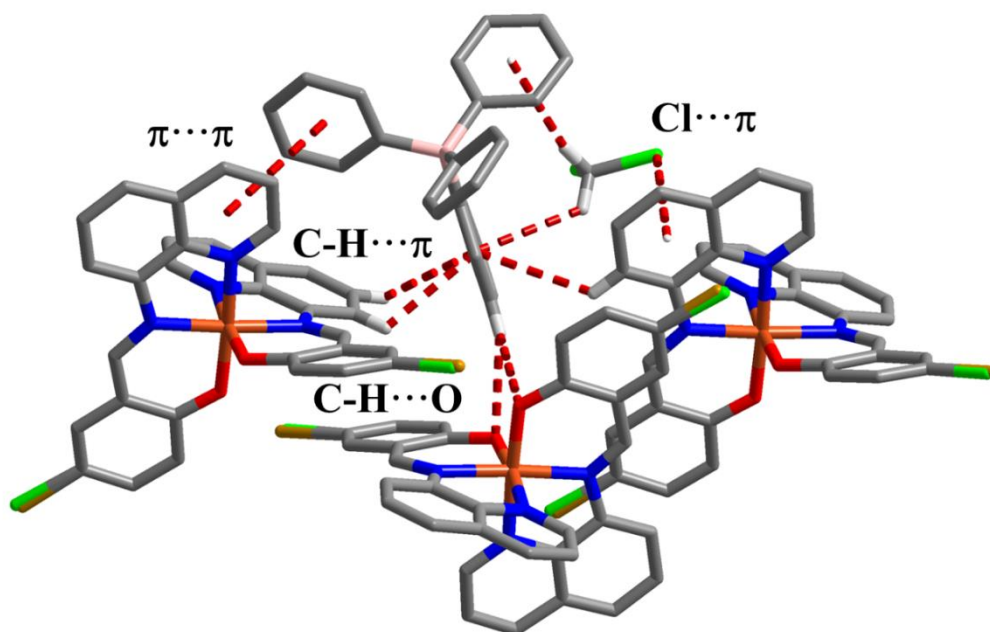

**Figure S7** View of the supramolecular connectivity of  $[\text{Fe}(\text{qsal-Cl})(\text{qsal-Br})]^+$  cation to the  $\text{BPh}_4^-$  anion and the  $\text{CH}_2\text{Cl}_2$  molecule in  $[\text{Fe}(\text{qsal-Cl})(\text{qsal-Br})]\text{BPh}_4 \cdot 2\text{CH}_2\text{Cl}_2$  **3**.

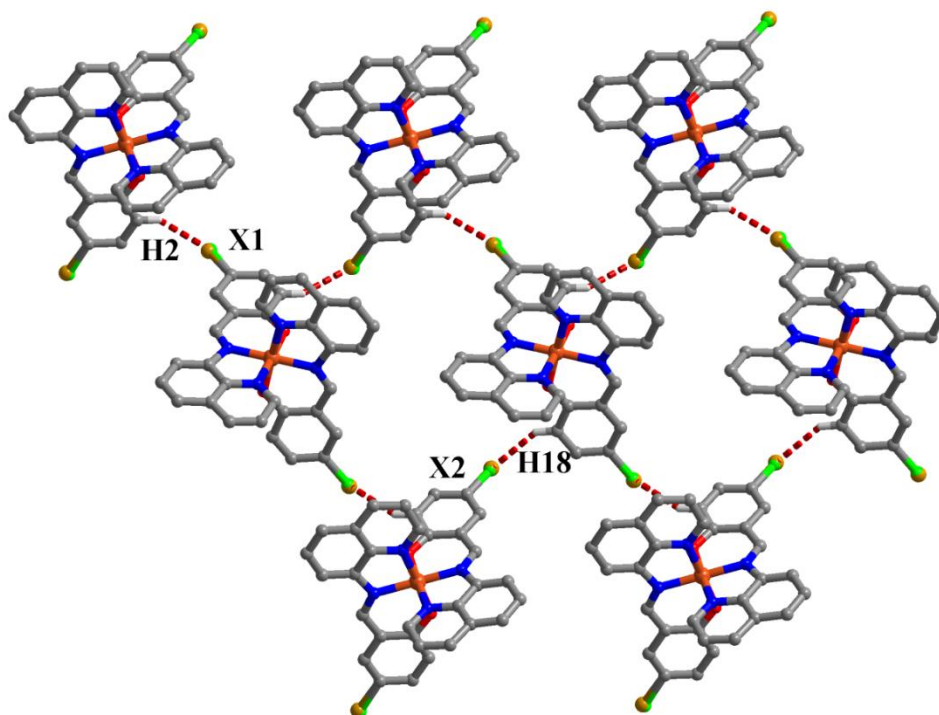

**Figure S8** View of the  $\text{C-H}\cdots\text{Cl/Br}$  interactions that link the  $[\text{Fe}(\text{qsal-Cl})(\text{qsal-Br})]^+$  cations in  $[\text{Fe}(\text{qsal-Cl})(\text{qsal-Br})]\text{OTf} \cdot 0.5\text{MeOH}$  **4**.
